# Supplementary material
Source: PubMed Central journal article supplement (PMC5711262)
Supplement: AnnalsATS.201706-453OC_donovan_data_supplement.pdf [file AnnalsATS.201706-453OC_donovan_data_supplement.pdf]

## **Online Data Supplement**

### **Sleep Disturbance in Smokers with Preserved Pulmonary Function and Chronic Obstructive Pulmonary Disease**

Lucas M. Donovan, MD; Peter J. Rise, MS; Shannon S. Carson, MD, MS; Laura C. Feemster, MD, MS; Matthew F. Griffith, MD; Vishesh K. Kapur, MD, MPH; Jerry A. Krishnan MD, PhD; Peter K. Lindenauer, MD, MS; Richard A. Mularski, MD, MSHS, MCR; Edward T. Naureckas MD; Brian N. Palen, MD; Elizabeth C. Parsons, MD, MS; Laura J. Spece, MD, MS; Michael V. Vitiello, PhD; and David H. Au MD, MS, for the CONCERT investigators

Supplemental Table: Adjusted and unadjusted correlation of general and respiratory-specific health status and symptoms with sleep disturbance in the overall population.

|                                  | Unadjusted                 | Adjusted                   |
|----------------------------------|----------------------------|----------------------------|
| Age (years)                      | <b>-0.24 (-0.32,-0.16)</b> | <b>-0.11 (-0.20,-0.03)</b> |
| Sex (Female)                     | <b>1.69 (0.06,3.32)</b>    | 0.82 (-0.61,2.25)          |
| Non-White                        | 1.60 (-0.42,3.63)          | 0.73 (-1.03,2.49)          |
| BMI (kg/m <sup>2</sup> )         | 0.07 (-0.05,0.18)          | -0.08 (-0.19,0.03)         |
| Non-Hypoxic                      | ref                        | ref                        |
| Hypoxic Uses Oxygen              | -0.16 (-1.96,1.63)         | 0.57 (-1.13,2.26)          |
| Hypoxic No Oxygen                | 2.02 (-1.11,5.14)          | 1.99 (-0.64,4.62)          |
| No Sleep Apnea                   | ref                        | ref                        |
| Sleep Apnea-Non-adherent to CPAP | <b>4.22 (2.18,6.26)</b>    | 1.21 (-0.64,3.05)          |
| Sleep Apnea- Adherent to CPAP    | 1.66 (-1.83,5.14)          | -2.07 (-5.36,1.22)         |
| PND                              | <b>7.54 (5.9,9.19)</b>     | <b>3.57 (1.91,5.23)</b>    |
| Cough                            | <b>2.10 (0.50,3.71)</b>    | 0.58 (-1.57,2.73)          |
| Phlegm                           | 1.50 (-0.24,3.25)          | -0.61 (-2.88,1.66)         |
| Wheezing                         | <b>4.27 (2.71,5.84)</b>    | 0.10 (-1.45,1.66)          |
| Depression (T-score)             | <b>0.47 (0.4,0.55)</b>     | <b>0.25 (0.13,0.37)</b>    |
| Pain Interference (T-score)      | <b>0.48 (0.4,0.55)</b>     | <b>0.24 (0.15,0.33)</b>    |
| Anxiety (T-score)                | <b>0.45 (0.37,0.53)</b>    | 0.0 (-0.12,0.12)           |
| Dyspnea (T-score)                | <b>0.42 (0.33,0.51)</b>    | <b>0.14 (0.03,0.25)</b>    |
| Currently Smoking                | <b>3.19 (1.54,4.83)</b>    | 0.58 (-1.13,2.3)           |
| Number of Comorbidities          | <b>1.13 (0.82,1.43)</b>    | 0.23 (-0.09,0.55)          |
| Baseline LABA                    | -0.99 (-2.70,0.73)         | -1.21 (-3.35,0.94)         |
| Baseline ICS                     | -0.07 (-1.69,1.56)         | 0.25 (-1.76,2.25)          |
| BASELINE SABA                    | 1.91 (0.33,3.49)           | -0.41 (-1.94,1.12)         |
| BASELINE LAMA                    | 0.26 (-1.53,2.05)          | 0.68 (-1.08,2.43)          |
| Baseline SAMA                    | 1.21 (-0.72,3.15)          | 0.56 (-1.13,2.24)          |
| Oral Corticosteroid              | -2.07 (-7.05,2.91)         | -0.64 (-4.88,3.6)          |
| FEV1 Percent Predicted           | <b>0.04 (0.00,0.07)</b>    | <b>0.04 (0.0,0.07)</b>     |

Table of beta coefficient with 95% CI for each hypothesized correlate of sleep disturbance. Beta coefficients refer to the magnitude of change in Sleep Disturbance T-Score for a one unit change in the exposure outlined in that row. Units for continuous exposures are noted in parentheses. Unadjusted correlates arise from univariate linear regression models (modeling Sleep Disturbance T-Score as outcome). Adjusted models include all other exposures in table. Significant relationships at p<0.05 level noted in bold. FEV1-forced expiratory Volume in 1 second, BMI-body mass index, PND-paroxysmal nocturnal dyspnea, FACIT-Functional Assessment of Chronic Illness Therapy, LABA-long acting beta agonist, LAMA-long acting muscarinic antagonist, SABA-short acting beta agonist, SAMA-short acting muscarinic antagonist, ICS-inhaled corticosteroid, SA-Sleep Apnea.
